# Supplementary material for: Unveiling the potent activity of a synthetic ion transporter against multidrug-resistant Gram-positive bacteria and biofilms
Source: Royal Society of Chemistry journal article supplement (doi:10.1039/d4md00002a), 2024-01-01
Supplement: d4md00002a1.pdf [file d4md00002a1.pdf]

## Supporting Information

### Unveiling the potent activity of a synthetic ion transporter against multidrug-resistant Gram-positive bacteria and biofilms

Sudip Mukherjee,<sup>a</sup> Sopan Valiba Shinde,<sup>b</sup> Pinaki Talukdar,<sup>b</sup> Jayanta Halder<sup>a,c\*</sup>

<sup>a</sup>Antimicrobial Research Laboratory, New Chemistry Unit, JNCASR, Jakkur, Bangalore-560064, India

<sup>b</sup>Department of Chemistry, Indian Institute of Science Education and Research Pune. Dr. Homi Bhabha Road, Pashan, Pune 411008, Maharashtra, India

<sup>c</sup>School of Advanced Materials, JNCASR, Jakkur, Bangalore-560064, India

| No. | Heading                 | Page |
|-----|-------------------------|------|
| 1.  | Synthesis of compound T | S1   |
| 2.  | NMR Data                | S3   |
| 3.  | Reference               | S5   |

#### 1. Synthesis of compound T:

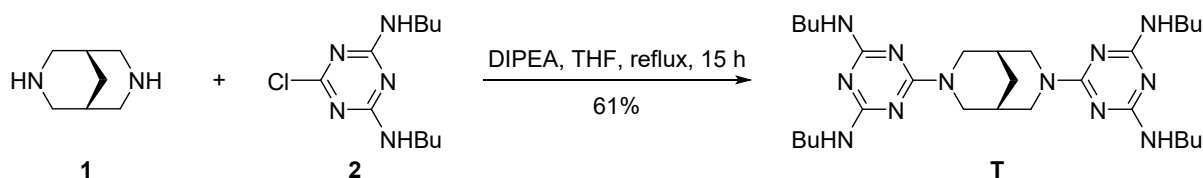

#### Scheme S1. Synthesis of compound T.

The compound T was synthesized using the reported protocol.<sup>S1</sup>

Compounds 1 and 2 were synthesized previously<sup>S1</sup> and were used directly for the preparation of T. In a 25 mL round bottom flask, a mixture of 1 (130 mg, 1.03 mmol) and 2 (664 mg, 2.58 mmol) was dissolved in 3.5 mL of anhydrous THF. A solution of DIPEA (538  $\mu$ L, 3.09 mmol) in 2 mL of THF was then added dropwise to the reaction mixture at room temperature. The resulting mixture was refluxed for 15 h under a nitrogen atmosphere. Upon completion of the reaction (monitored by TLC), THF was removed under vacuum using a rotary evaporator. The residue was then extracted with ethyl acetate (20 mL), dried over Na<sub>2</sub>SO<sub>4</sub>, and concentrated

under reduced pressure to yield a thick yellowish oil. This oil was subsequently purified by column chromatography on silica gel using 2% MeOH in CHCl<sub>3</sub> as the eluent, resulting in the isolation of compound **T** (357 mg, 61%) as a white solid. **<sup>1</sup>H NMR (400 MHz, CDCl<sub>3</sub>):** δ 4.80 (s, 4H), 3.27 (s, 8H), 3.05 (dd, *J* = 13.0, 3.1 Hz, 4H), 1.93 (d, *J* = 29.9 Hz, 4H), 1.56 – 1.45 (m, 8H), 1.41 – 1.31 (m, 8H), 0.93 (t, *J* = 7.3 Hz, 12H). **<sup>13</sup>C NMR (101 MHz, CDCl<sub>3</sub>):** δ 164.85, 164.76, 47.72, 40.55, 32.05, 31.97, 28.63, 20.26, 13.97.

## 2. NMR Data:

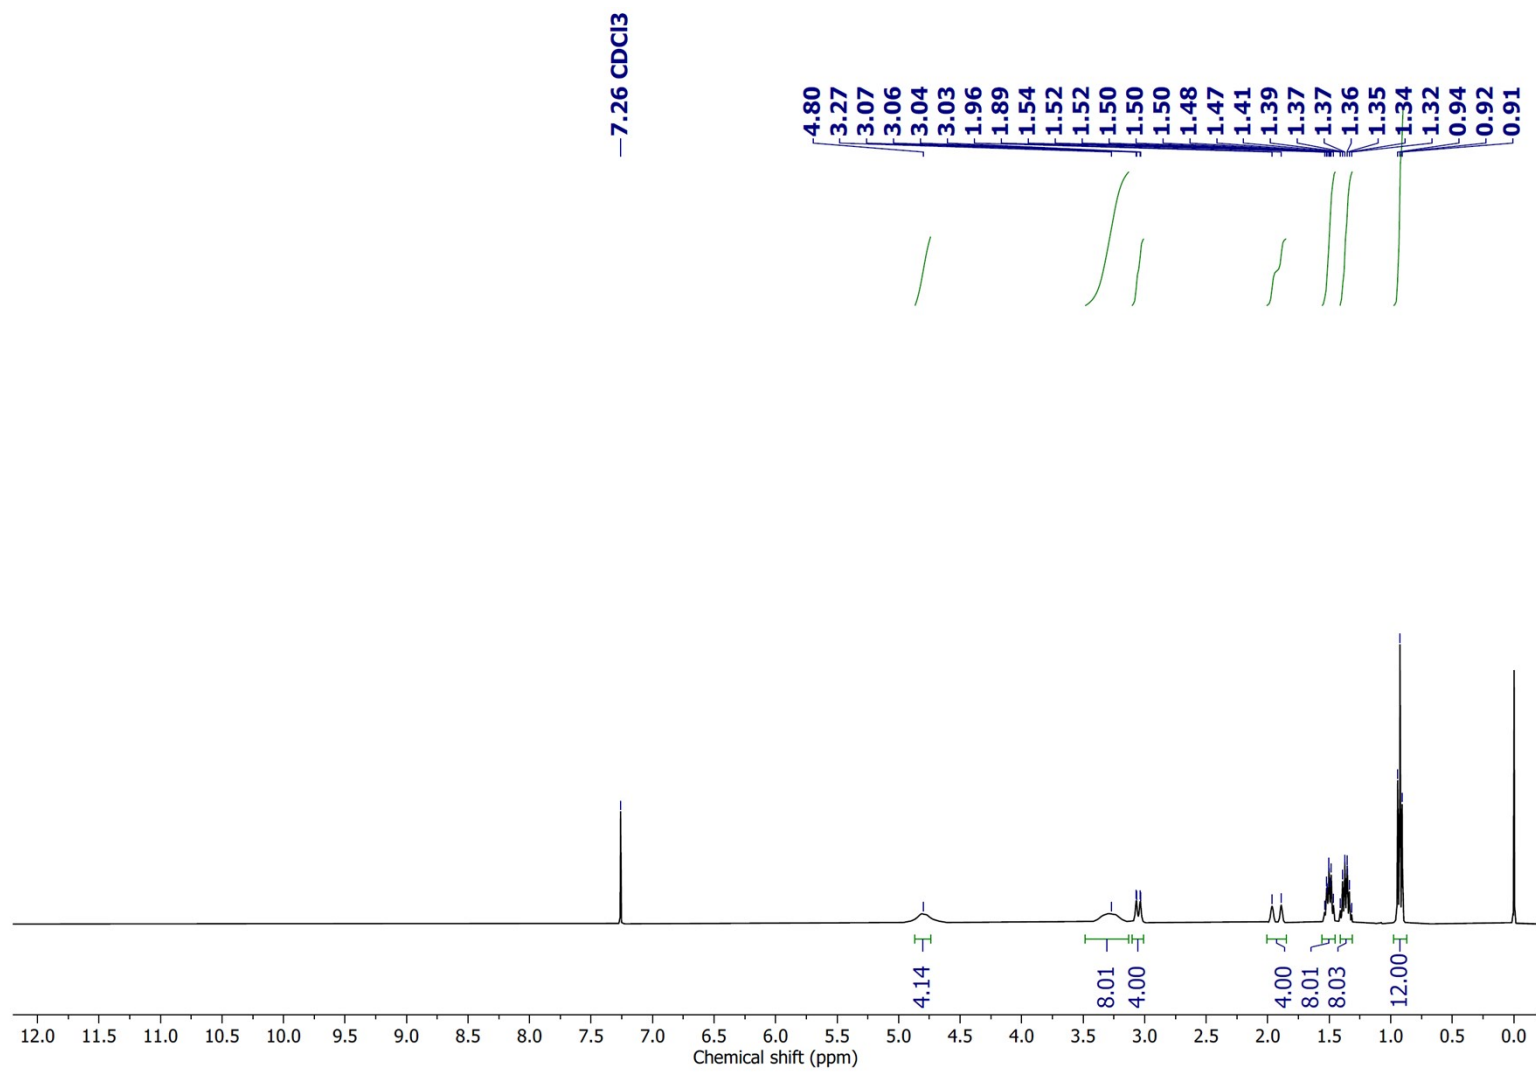

**Figure S1.** <sup>1</sup>H NMR (400 MHz) of compound **T** in CDCl<sub>3</sub> solvent at 25 °C.

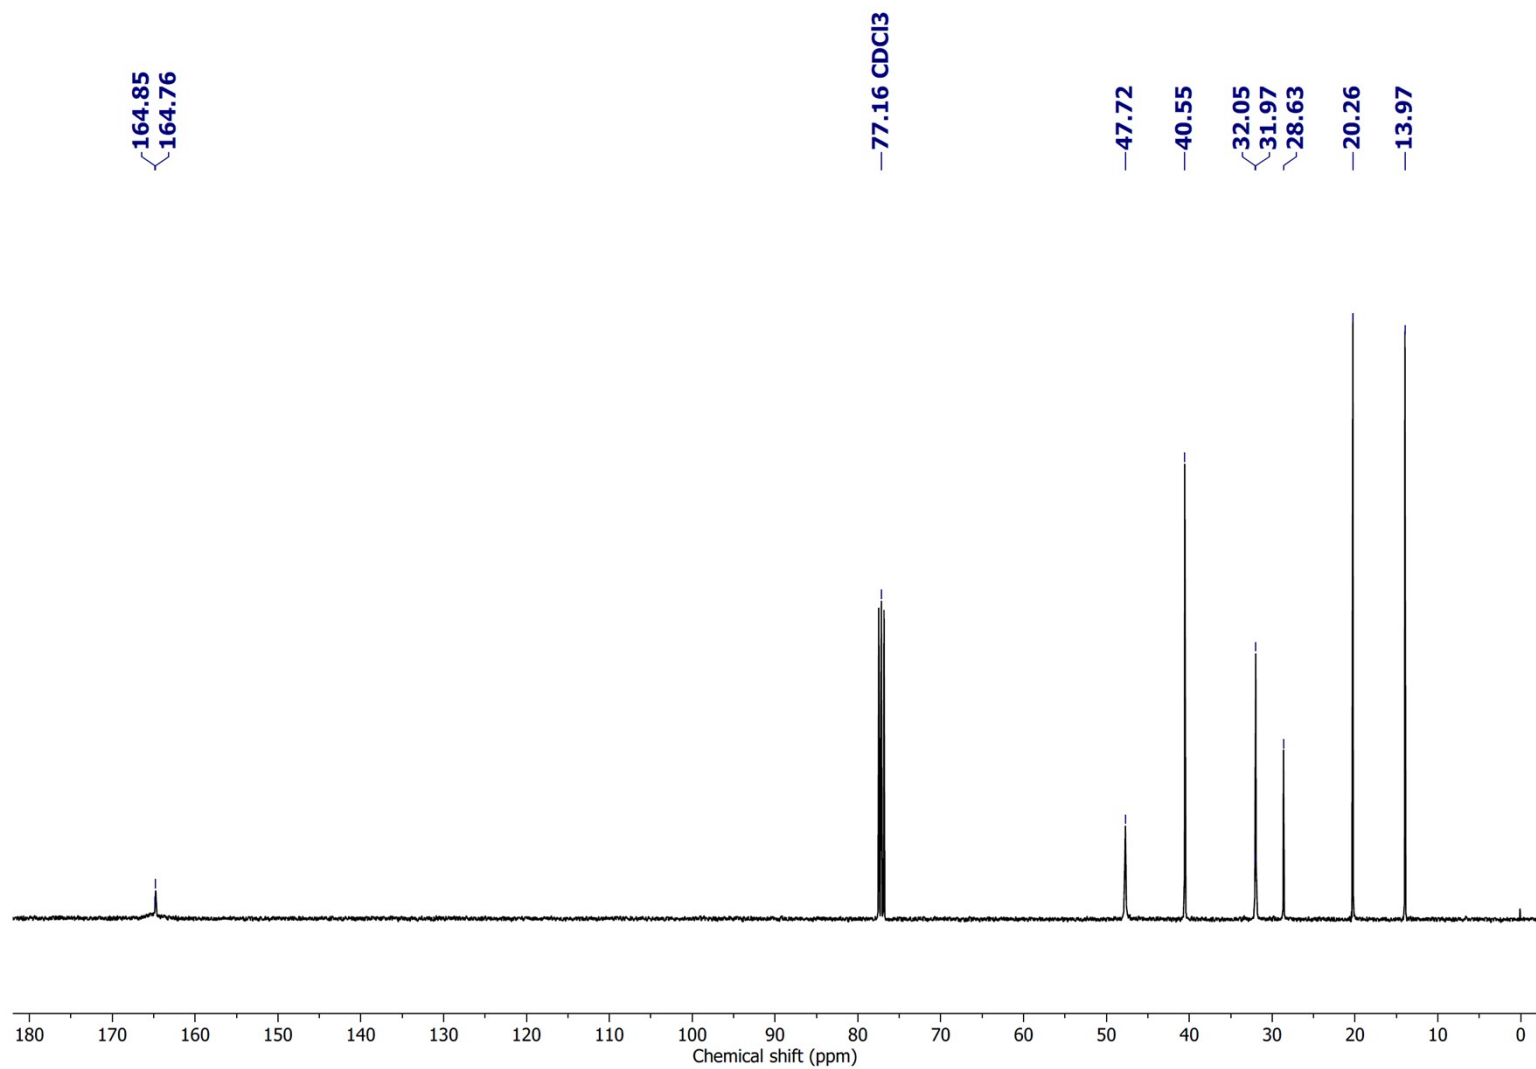

**Figure S2.**  $^{13}\text{C}$  NMR (101 MHz) of compound **T** in  $\text{CDCl}_3$  solvent at 25  $^\circ\text{C}$ .

### 3. Reference:

S1. S. V. Shinde, P. Talukdar, *Angew. Chem., Int. Ed.*, 2017, **56**, 4238–4242.
